# Supplementary material for: CRISPR/Cas9 deletion of ORMDLs reveals complexity in sphingolipid metabolism
Source: PubMed Central journal article supplement (PMC8167824; doi:10.1016/j.jlr.2021.100082), 2021-04-30

# Supplementary Figure 1.

## ORMDL1 gRNA locus

Ormdl1 gRNA sequence: ACCCGTGTTCATGAACAGCCG  
 Reference sequence: 5' GAAGTGAATCCAAAT ACCCGTGTTCATGAACAGCCG GGG 3'  
 E V N P N T R V M N S R  
 gRNA CTL sequence: GAAGTGAATCCAAAT ACCCGTGTTCATGAACAGCCG GGG  
 E V N P N T R V M N S R  
 TKO sequence: [ GAAGTGAATCCAAAT ACCCGTGTTCATGAACAG AGCGTG  
 E V N P N T R V M N R A  
 GAAGTGAATCCAAAT ACCCGTGTTCATGAACAGCC CGTG  
 E V N P N T R V M N S P  
 GAAGTGAATCCAAAT ACCCGTGTTCATGAAC GGATAGG  
 E V N P N T R V M N G I

■ Bases matching gRNA sequence

■ Bases/Amino acids mismatching gRNA sequence

## ORMDL2 gRNA locus

Ormdl2 gRNA sequence: ACCCGAGTGTGAATAGCCG  
 Reference sequence: 5' GAAGTAAACCCCAAC ACCCGAGTGTGAATAGCCG AGG  
 E V N P N T R V M N S R  
 gRNA CTL sequence: GAAGTAAACCCCAAC ACCCGAGTGTGAATAGCCG AGG  
 E V N P N T R V M N S R  
 TKO sequence: [ GAAGTAAACCCCAAC ACCCGAGTGTGAATAG TCATCC  
 E V N P N T R V M N S H  
 GAAGTAAACCCCAAC ACCCGAGTGTGAATAG TCAAAC  
 E V N P N T R V M N S Q  
 GAAGTAAACCCCAAC ACCCGAGTGTGA GGCAGATGCT  
 E V N P N T R V M R Q M

## ORMDL3 gRNA locus

Ormdl3 gRNA sequence: CGAGGTGAACCCCAACACGC  
 Reference sequence: 5' GGCACAGCGCACAG CGAGGTGAACCCCAACACGC GGG 3'  
 G T A H S E V N P N T R  
 gRNA CTL sequence: GGCACAGCGCACAG CGAGGTGAACCCCAACACGC GGG  
 G T A H S E V N P N T R  
 Ormdl3 KO sequence: [ GGCACAGCGCACAG CGAGGTGAACCCCAACAC C CGG  
 G T A H S E V N P N T P  
 GGCACAGCGCACAG CGAGGTGAACCCCAACAC C CGG  
 G T A H S E V N P N T P  
 GGCACAGCGCACAG CGAGGTGAACCCCAACACG ACGC  
 G T A H S E V N P N T T  
 TKO sequence: [ GGCACAGCGCACAG CGAGGTGAACCCCAACA ATGAAC  
 G T A H S E V N P N N E  
 GGCACAGCGCACAG CGAGGTGAACCCGAACA ATGACC  
 G T A H S E V N P N N D  
 GGCACAGCGCACAG CGAGGTG CTCGATGATAACCGG  
 G T A H S E V L A D N A

## Supplementary Figure 2.

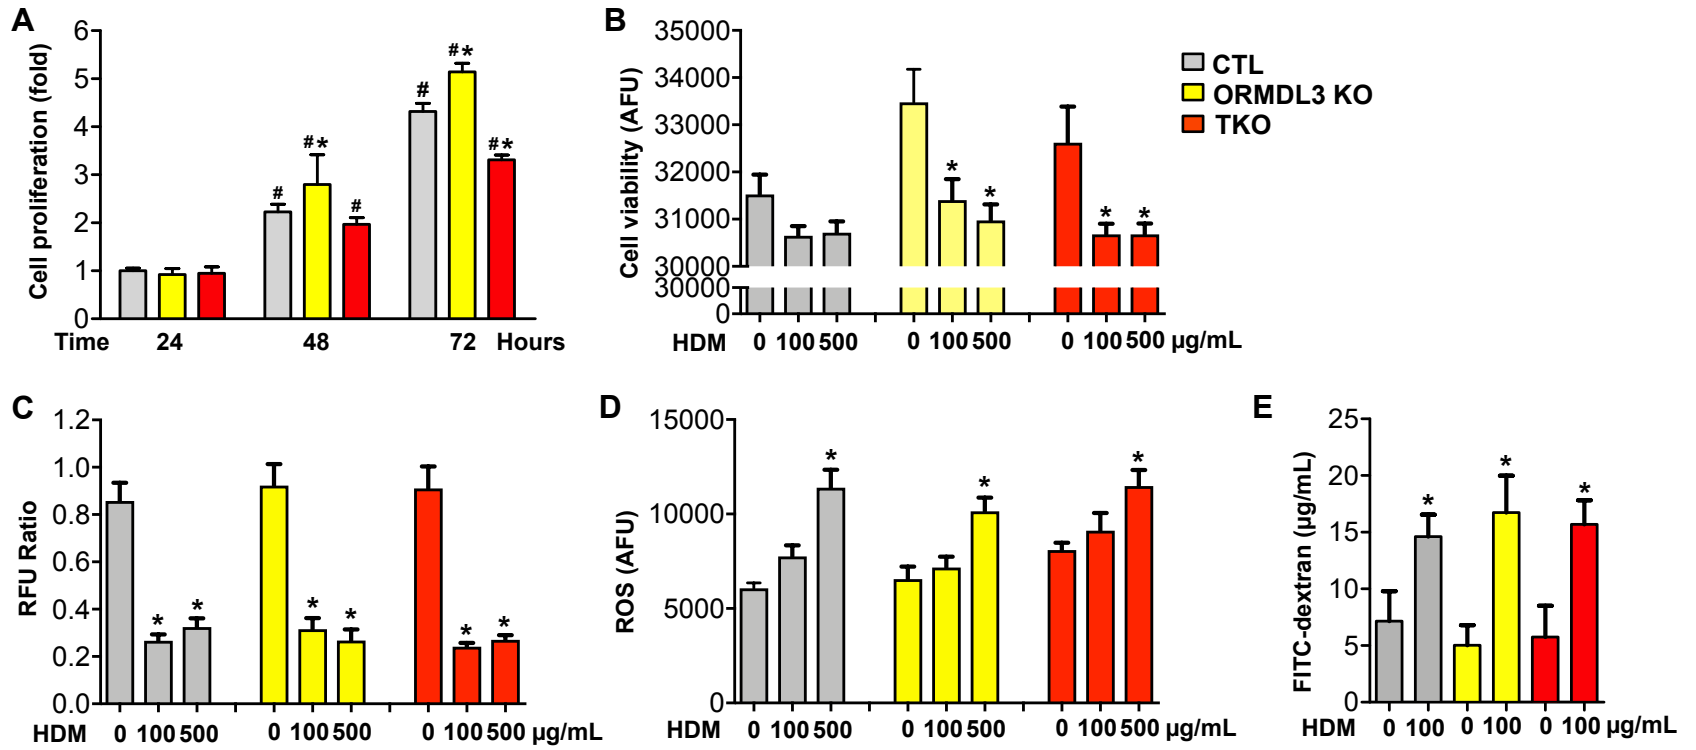

Supplement: mmc1.pdf [file mmc1.pdf]
