# Supplementary material for: CRISPR/Cas9 deletion of ORMDLs reveals complexity in sphingolipid metabolism
Source: PubMed Central journal article supplement (PMC8167824; doi:10.1016/j.jlr.2021.100082), 2021-04-30
Supplement: mmc2.pdf [file mmc2.pdf]

**Supplementary Table 1. Detection of CRISPR/Cas9 editing with ORMDL sgRNAs by Sanger sequencing.**

| CRISPR/Cas9 editing detection |                             |      |      |            |            |     |
|-------------------------------|-----------------------------|------|------|------------|------------|-----|
| Primer locus                  | Target sequence             | CTL1 | CTL2 | ORMDL3 KO1 | ORMDL3 KO2 | TKO |
| ORMDL1 gRNA                   | ACCCGTGTCATGA<br>ACAGCCG    | No   | No   | No         | No         | Yes |
| ORMDL2 gRNA                   | ACCCGAGTGATGA<br>ATAGCCG    | No   | No   | No         | No         | Yes |
| ORMDL3 gRNA                   | CGAGGTGAACCCC<br>AACACGC    | No   | No   | Yes        | Yes        | Yes |
| ORMDL1 off-target 1           | CCCCCTGTAATGA<br>ACAGCCA    | No   | No   | ---        | ---        | No  |
| ORMDL1 off-target 2           | TCCCTTGGCATGA<br>ACAGCCT    | No   | No   | ---        | ---        | No  |
| ORMDL2 off-target 1           | AACCGAGTGCTGA<br>ATAGCAATGG | No   | No   | ---        | ---        | No  |
| ORMDL2 off-target 2           | ACCAAAGTGAGGA<br>AGAGCCGAGG | No   | No   | ---        | ---        | No  |
| ORMDL3 off-target 1           | ATGGGTGAACCCC<br>AACACAC    | No   | No   | No         | No         | No  |
| ORMDL3 off-target 2           | CCTGCTGAACCCC<br>TACACGC    | No   | No   | No         | No         | No  |
| ORMDL3 off-target 3           | GGAGGTGGACCCC<br>AACATCC    | No   | No   | No         | No         | No  |
| ORMDL3 off-target 4           | GGAGGTGGACCCC<br>AACATCC    | No   | No   | No         | No         | No  |
| ORMDL3 off-target 5           | CCAGGTGAACACC<br>AGCACCC    | No   | No   | No         | No         | No  |
| ORMDL3 off-target 6           | GGAGGTGAACACC<br>ACCACCC    | No   | No   | No         | No         | No  |
| ORMDL3 off-target 7           | CGACGTGAACGAC<br>AACGCGC    | No   | No   | No         | No         | No  |
| ORMDL3 off-target 8           | CGACGTGAACGAC<br>AACGCGC    | No   | No   | No         | No         | No  |
| ORMDL3 off-target 9           | CGAGTTGCACCCC<br>ACCACCC    | No   | No   | No         | No         | No  |
| ORMDL3 off-target 10          | CGAGGTGCACCCC<br>CACCTC     | No   | No   | No         | No         | No  |
| ORMDL3 off-target 11          | CGAGGTGAACCCG<br>GACCCAC    | No   | No   | No         | No         | No  |
| ORMDL3 off-target 12          | CGCGGTGCACCCC<br>CAGACGC    | No   | No   | No         | No         | No  |
