# Supplementary material for: CRISPR/Cas9 deletion of ORMDLs reveals complexity in sphingolipid metabolism
Source: PubMed Central journal article supplement (PMC8167824; doi:10.1016/j.jlr.2021.100082), 2021-04-30
Supplement: mmc4.pdf [file mmc4.pdf]

**Supplementary Table 3. Fold change in sphingolipid species in ORMDL3 knockout cells**

| Sphingolipid               | Cells     | Sphingolipid species  |            |                       |                       |            |                       |                       |                       |          |                       |
|----------------------------|-----------|-----------------------|------------|-----------------------|-----------------------|------------|-----------------------|-----------------------|-----------------------|----------|-----------------------|
|                            |           | C14                   | C16:0      | C18:1                 | C18:0                 | C20:0      | C22:0                 | C24:1                 | C24:0                 | C26:1    | C26:0                 |
| Dihydroceramide            | CTL       | 1.0±0.19              | 1.0±0.03   | 1.0±0.07              | 1.0±0.04              | 1.0±0.09   | 1.0±0.03              | 1.0±0.01              | 1.0±0.03              | 1.0±0.03 | 1.0±0.13              |
|                            | ORMDL3 KO | 1.0±0.22              | 2.9±0.48*  | 0.9±0.15              | 1.9±0.34 <sup>#</sup> | 2.0±0.50   | 1.9±0.41 <sup>#</sup> | 1.2±0.20              | 1.0±0.08              | 0.8±0.10 | 0.9±0.13              |
| Ceramide                   | CTL       | 1.0±0.20              | 1.0±0.03   | 1.0±0.07              | 1.0±0.05              | 1.0±0.08   | 1.0±0.03              | 1.0±0.01              | 1.0±0.03              | 1.0±0.04 | 1.0±0.13              |
|                            | ORMDL3 KO | 1.0±0.22              | 2.9±0.48*  | 0.9±0.16              | 1.9±0.34 <sup>#</sup> | 2.0±0.51   | 1.9±0.41 <sup>#</sup> | 1.3±0.15              | 1.4±0.03**            | 0.8±0.09 | 0.9±0.12              |
| Galactosyl-dihydroceramide | CTL       | 1.0±0.15              | 1.0±0.03   | 1.0±0.06              | 1.0±0.04              | 1.0±0.07   | 1.0±0.04              | 1.0±0.04              | 1.0±0.04              | 1.0±0.11 | 1.0±0.03              |
|                            | ORMDL3 KO | 1.1±0.30              | 0.8±0.07*  | 0.9±0.23              | 1.0±0.21              | 1.2±0.23   | 1.0±0.17              | 0.8±0.14              | 0.9±0.04              | 1.1±0.34 | 0.8±0.06 <sup>#</sup> |
| Glactosylceramide          | CTL       | 1.0±0.15              | 1.0±0.04   | 1.0±0.06              | 1.0±0.03              | 1.0±0.07   | 1.0±0.04              | 1.0±0.03              | 1.0±0.04              | 1.0±0.12 | 1.0±0.03              |
|                            | ORMDL3 KO | 1.1±0.28              | 0.8±0.07*  | 0.8±0.22              | 1.0±0.21              | 1.2±0.24   | 1.0±0.15              | 0.8±0.13              | 0.9±0.03              | 1.1±0.31 | 0.8±0.05*             |
| Glucosyl-dihydroceramide   | CTL       | 1.0±0.15              | 1.0±0.03   | 1.0±0.06              | 1.0±0.04              | 1.0±0.07   | 1.0±0.03              | 1.0±0.04              | 1.0±0.04              | 1.0±0.12 | 1.0±0.03              |
|                            | ORMDL3 KO | 1.1±0.29              | 0.8±0.07*  | 0.8±0.22              | 1.0±0.22              | 1.1±0.23   | 1.0±0.15              | 0.8±0.13              | 0.9±0.03              | 1.1±0.30 | 0.8±0.05*             |
| Glucosylceramide           | CTL       | 1.0±0.15              | 1.0±0.03   | 1.0±0.06              | 1.0±0.04              | 1.0±0.07   | 1.0±0.04              | 1.0±0.04              | 1.0±0.04              | 1.0±0.12 | 1.0±0.03              |
|                            | ORMDL3 KO | 1.1±0.28              | 0.8±0.07*  | 0.8±0.22              | 1.0±0.21              | 1.2±0.23   | 1.0±0.15              | 0.8±0.13              | 0.9±0.03              | 1.1±0.31 | 0.8±0.05*             |
| Lactosylceramide           | CTL       | 1.0±0.20              | 1.0±0.04   | 1.0±0.07              | 1.0±0.04              | 1.0±0.09   | 1.0±0.03              | 1.0±0.02              | 1.0±0.04              | 1.0±0.03 | 1.0±0.13              |
|                            | ORMDL3 KO | 0.9±0.22              | 2.8±0.51*  | 0.9±0.17              | 1.8±0.35 <sup>#</sup> | 1.9±0.50   | 1.8±0.42              | 1.2±0.17              | 1.3±0.06**            | 0.8±0.12 | 0.8±0.12              |
| Monohexosyl-ceramide       | CTL       | 1.0±0.15              | 1.0±0.04   | 1.0±0.06              | 1.0±0.04              | 1.0±0.07   | 1.0±0.04              | 1.0±0.05              | 1.0±0.04              | 1.0±0.12 | 1.0±0.16              |
|                            | ORMDL3 KO | 1.1±0.27              | 0.8±0.07*  | 0.8±0.22              | 1.0±0.21              | 1.2±0.23   | 1.0±0.15              | 1.0±0.15              | 0.9±0.02              | 1.1±0.31 | 1.5±0.37              |
| Dihydro-sphingomyelin      | CTL       | 1.0±0.07              | 1.0±0.02   | 1.0±0.06              | 1.0±0.02              | 1.0±0.04   | 1.0±0.03              | 1.0±0.05              | 1.0±0.01              | 1.0±0.05 | 1.0±0.09              |
|                            | ORMDL3 KO | 1.3±0.09 <sup>#</sup> | 1.3±0.03** | 1.6±0.09**            | 2.4±0.13**            | 1.8±0.10** | 1.5±0.04**            | 0.8±0.02*             | 1.2±0.04**            | 1.2±0.14 | 0.9±0.14              |
| Sphingomyelin              | CTL       | 1.0±0.06              | 1.0±0.02   | 1.0±0.06              | 1.0±0.06              | 1.0±0.05   | 1.0±0.03              | 1.0±0.04              | 1.0±0.01              | 1.0±0.05 | 1.0±0.09              |
|                            | ORMDL3 KO | 1.2±0.12              | 1.1±0.09** | 1.2±0.09 <sup>#</sup> | 1.4±0.18              | 1.1±0.07   | 1.3±0.07**            | 1.1±0.05 <sup>#</sup> | 1.1±0.06 <sup>#</sup> | 0.9±0.07 | 1.0±0.09              |

<sup>#</sup> p < 0.05; \* p < 0.01; \*\* p < 0.001 compared to CTL.
